# Supplementary material for: A multi-attribute approach to evaluating the impact of biostimulants on crop performance
Source: Frontiers journal article supplement (doi:10.3389/fpls.2023.1214112), 2023-08-10
Supplement: Table_1.xls [file Table_1.xls]

## Sheet: Identification
	RURAL ESTABLISHMENT IDENTIFICATION
1	Farmstead name	Date
2	Farmstead administrator		Telephone
3	Address and georeference		Geographic coordinates				Dg	Min	Sec	Altitude
						Latitude
						Longitude
4	Total area of farmstead		ha
5	All productive activities (products, services, conservation)
6	Areas / crops managed with biostimulant (application rates, observations)
7	Biostimulants application cycles (details, observations)
8	Please point out the three most important difficulties or problems for the performance of the main activity evaluated
a)
b)
c)

## Sheet: Crop production
Crop production - Vegetative development and productive performance
Tillers / m
Stand
Control	Biostimulant
11.5	12
Index, stand quality								Best fit equation for Utility
		4.34405						Logistic model: y=a/(1+b*exp(-cx))
IStand=	Utility							Coefficients:
-100	0		4.34405					a =	1
-50	0.1							b =	0.42
-20	0.2							c =	0.06
-10	0.4
0	0.7							U-IStand=		0.755496
50	0.9
100	1
Root length (cm)
Rooting
Control	Biostimulant
32	45
Rooting index								Best fit equation for Utility
		40.6123						Logistic model: y=a/(1+b*exp(-cx))
IRoot=	Utility							Coefficients:
-100	0		40.6123					a =	1
-50	0.1							b =	0.42
-20	0.2							c =	0.06
-10	0.4
0	0.7							U-IRoot=		0.964574
50	0.9
100	1
Stem length (cm)
Plant vigor 1
Control	Biostimulant
3.5	3.9
Index Plant vigor 1								Best fit equation for Utility
		11.396						Logistic model: y=a/(1+b*exp(-cx))
IVigor1=	Utility							Coefficients:
-100	0		11.396					a =	1
-50	0.1							b =	0.42
-20	0.2							c =	0.06
-10	0.4
0	0.7							U-IVigor1=		0.825096
50	0.9
100	1
Average number of internodes
Plant vigor 2
Control	Biostimulant
16	17
Index Plant vigor 2								Best fit equation for Utility
		6.2461						Logistic model: y=a/(1+b*exp(-cx))
IVigor2=	Utility							Coefficients:
-100	0		6.2461					a =	1
-50	0.1							b =	0.42
-20	0.2							c =	0.06
-10	0.4
0	0.7							U-IVigor2=		0.775958
50	0.9
100	1
Leaves / plant
Plant vigor 3
Control	Biostimulant
8	10
Index Plant vigor 3								Best fit equation for Utility
		24.9688						Logistic model: y=a/(1+b*exp(-cx))
IVigor3=	Utility							Coefficients:
-100	0		24.9688					a =	1
-50	0.1							b =	0.42
-20	0.2							c =	0.06
-10	0.4
0	0.7							U-IVigor3=		0.914168
50	0.9
100	1
Average plant height (cm)
Plant vigor 4
Control	Biostimulant
24	28
Index Plant vigor 4								Best fit equation for Utility
		16.6597						Logistic model: y=a/(1+b*exp(-cx))
IVigor4=	Utility							Coefficients:
-100	0		16.6597					a =	1
-50	0.1							b =	0.42
-20	0.2							c =	0.06
-10	0.4
0	0.7							U-IVigor4=		0.866121
50	0.9
100	1
Tons of juice/t fruit
Product quality
Control	Biostimulant
16.4	22.3
Index Product quality								Best fit equation for Utility
		35.9537						Logistic model: y=a/(1+b*exp(-cx))
IProdQual=	Utility							Coefficients:
-100	0		35.9537					a =	1
-50	0.1							b =	0.42
-20	0.2							c =	0.06
-10	0.4
0	0.7							U-IProdQual=		0.953679
50	0.9
100	1
Ton / ha
Productivity
Control	Biostimulant
86	101
Index Productivity								Best fit equation for Utility
		17.4398						Logistic model: y=a/(1+b*exp(-cx))
IProd=	Utility							Coefficients:
-100	0		17.4398					a =	1
-50	0.1							b =	0.42
-20	0.2							c =	0.06
-10	0.4
0	0.7							U-IProd=		0.871456
50	0.9
100	1
Net revenue ($/ha)
Revenue
Control	Biostimulant
4202	7041
Index Revenue								Best fit equation for Utility
		67.5629						Logistic model: y=a/(1+b*exp(-cx))
IRev=	Utility							Coefficients:
-100	0		67.5629					a =	1
-50	0.1							b =	0.42
-20	0.2							c =	0.06
-10	0.4
0	0.7							U-IRev=		0.992763
50	0.9
100	1
Indicators of Crop development and Productive performance				Confirm indicator (insert 1)	Performance indices	Baseline
Tillers / m				1	0.755496	0.7
Root length (cm)				1	0.964574	0.7
Stem length (cm)				1	0.825096	0.7
Average number of internodes				1	0.775958	0.7
Leaves / plant				1	0.914168	0.7
Average plant height (cm)				1	0.866121	0.7
Tons of juice/t fruit				1	0.953679	0.7
Ton / ha				1	0.871456	0.7
Net revenue ($/ha)				1	0.992763	0.7
				9	0.879923

## Sheet: Soil chemistry
Soil chemistry
Table Percent organic matter
O. M.
Control	Biostimulant
2.2	2.3
Index Organic matter		Percent change OM						Best fit equation for Utility
ISoilOM=		4.52489						Logistic model: y=a/(1+b*exp(-cx))
ISoilOM=	Utility							Coefficients:
-100	0		4.52489					a =	1
-50	0.1							b =	0.42
-20	0.2							c =	0.06
-10	0.4
0	0.7							U-ISoilOM=		0.757495
50	0.9
100	1
Table pH
pH
Control	Biostimulant
5.6	6.7
Index soil pH 1=			Deviation from neutrality=			7-pH		Best fit equation for Utility
Index soil pH 2=			Acidity induction=			(7-pHBio)-(7-pHCon)
ISoilpH1		-0.3
ISoilpH2		0						1. Quadratic fit: y=a+bx+cx^2
ISoilpH1	ISoilpH2	Utility						2. 3º deg. polynomial: y=a+bx+cx^2+dx^3
3	-3	0	-0.3	0				Coefficients:
2.5	-2.5	0.2						a =	0.95035	a =	0.990834
2	-2	0.4						b =	-4.8801e-18	b =	0.847086
1.5	-1	0.5						c =	-0.113287	c =	0.459714
1	-0.7	0.6								d =	0.0963221
0.5	-0.4	0.7						U-ISoilpH1=		0.940154	0.940154
0	0	1						U-ISoilpH2=		0.990834	0.990834
-0.5		0.7
-1		0.6
-1.5		0.5
-2		0.4
-2.5		0.2
-3		0
Table mg P / dm3 soil
Phosphorus
Control	Biostimulant
45	35
Index P1=		Percnet change in P						Best fit equation for Utility
		-22.2173
IP2=		35						1. Logistic model: y=a/(1+b*exp(-cx))
IP1=	IP2	Utility						2. Quadratic fit: y=a+bx+cx^2
-100	1	0	-22.2173	35				Coefficients:
-50	5	0.2						a =	1	a =	0.04
-25	10	0.4						b =	0.42	b =	0.027
0	20	0.6						c =	0.070072	c =	-0.00019
25	40	0.8
100	100	1						U-IP1=		0.334187
	120	0.6						U-IP2=		0.75225
Table mmolc/dm3
Potassium
Control	Biostimulant
1.25	1.56
Index K1=		Percent change in K						Best fit equation for Utility
		24.6032
IK2		15.6						1. Logistic model: y=a/(1+b*exp(-cx))
IK1	IK2 (*10)	Utility						2. Quadratic fit: y=a+bx+cx^2
-100	1	0	24.6032	15.6				Coefficients:
-50	5	0.2						a =	1	a =	0.04
-25	10	0.4						b =	0.42	b =	0.027
0	20	0.6						c =	0.070072	c =	-0.00019
25	40	0.8
100	100	1						U-IK1=		0.930312
	120	0.6						U-IK2=		0.414962
Table mmolc/dm3
Ca
Control	Biostimulant
12.6	14.5
Table mmolc/dm3
Mg
Control	Biostimulant
2.9	7
Index Mg1=		Percent change soil Mg						Best fit equation for Utility
		100
IMg2		70						1. Logistic model: y=a/(1+b*exp(-cx))
IMg1	IMg2 (*10)	Utility						2. Quadratic fit: y=a+bx+cx^2
-100	0	0	100	70				Coefficients:
-50	5	0.2						a =	1	a =	0.054
-25	20	0.4						b =	0.42	b =	0.0194
0	60	0.6						c =	0.070072	c =	-9.966e-05
25	90	0.8
100	100	1						U-IMgtroc-1=		0.99962
	120	0.6						U-IMgtroc-2=		0.923666
Table mmolc/dm3
H + Al (potential acidity)
Control	Biostimulant
4.5	3.5
Index potential acidity 1=		Percent change H+Al						Best fit equation for Utility
		-22.1729
IH+Al2		3.5						1. Ajuste senosóide: y=a+b*cos(cx+d)
IH+Al1	IH+Al2	Utility						2. 3º deg. polynomial: y=a+bx+cx^2+dx^3
100	80	0	-22.1729	3.5				Coefficients:
60	70	0.1						a =	0.56	a =	1
40	60	0.2						b =	0.58	b =	-0.0261804
20	40	0.4						c =	0.021	c =	0.000253592
0	20	0.7						d =	1.33	d =	-1.28478e-06
-50	10	0.9						U-IH+Al-1=		0.93649	0.93649
-100	5	1						U-IH+Al-2=		0.91142	0.91142
Table mmolc/dm3
Total bases
Control	Biostimulant
16.75	23.06
Index total bases 1=		Percent variation total bases						Best fit equation for Utility
		37.6492
ITb2=		23.06						1. Logistic model: y=a/(1+b*exp(-cx))
ITb1	ITb2	Utility						2. Model MMF: y=(a*b+c*x^d)/(b+x^d)
-100	7	0	37.6492	23.06				Coefficients:
-50	10	0.1						a =	1	a =	-0.0299489
-10	15	0.2						b =	0.42	b =	4981.34
-5	20	0.4						c =	0.06	c =	0.997244
0	30	0.7								d =	2.73642
50	60	0.9						U-ITb-1=		0.957971
100	100	1						U-ITb-2=		0.502566
Table mmolc/dm3
CEC
Control	Biostimulant
21.25	26.56
Index exchange cation capacity 1=		Percent change CEC						Best fit equation for Utility
		24.9765
ICEC2=		26.56						1. Logistic model: y=a/(1+b*exp(-cx))
ICEC1	ICEC2	Utility						2. Model MMF: y=(a*b+c*x^d)/(b+x^d)
-100	7	0	24.9765	26.56				Coefficients:
-50	10	0.1						a =	1	a =	-0.0299489
-10	15	0.2						b =	0.42	b =	4981.34
-5	20	0.4						c =	0.06	c =	0.997244
0	30	0.7								d =	2.73642
50	60	0.9						U-ICEC-1=		0.914205
100	100	1						U-ICEC-2=		0.599827
Table bases saturation
Bases saturation
Control	Biostimulant
78.7865	86.7896
Index bases saturation 1=		Percent change bases saturation						Best fit equation for Utility
		10.1568
IBS2=		86.7896						1. Logistic model: y=a/(1+b*exp(-cx))
IBS1	IBS2	Utility						2. Quadratic fit: y=a+bx+cx^2
-100	5	0	10.1568	86.7896				Coefficients:
-50	10	0.1						a =	1	a =	-0.00544043
-10	25	0.2						b =	0.42	b =	0.00696803
-5	50	0.4						c =	0.06	c =	3.20457e-05
0	75	0.7
50	90	0.9						U-IVB-1=		0.814105
100	100	1						U-IVB-2=		0.840694
Indicators Soil chemistry		Confirm indicator (insert 1)	Quality indices	Impact indices (change)	Baseline (0,7)
Organic matter		1	0.757495	0.757495	0.7
pH		1	0.940154	0.990834	0.7
Phosphorus		1	0.75225	0.334187	0.7
Potassium		1	0.414962	0.930312	0.7
Magnesium		1	0.923666	0.99962	0.7
H+Al		1	0.91142	0.93649	0.7
Total bases		1	0.502566	0.957971	0.7
CEC		1	0.599827	0.914205	0.7
Bases saturation		1	0.840694	0.814105	0.7
		9	0.738115	0.848358

## Sheet: Soil physics
Soil physics
Table hydraulic conductivity (mm/h)
Hydraulic conditivity
Control	Biostimulant
368	392
Hydraulic conductivity index 1=		Percent change hydraulic conductivity (mm/h)						Best fit equantion for Utility
		6.52156
IHydrCond2=		78.4						1. Logistic model: y=a/(1+b*exp(-cx))
IHydrCond1	IHydrCond2 (/5)	Utility						2. Exponential fit: y=a(1-exp(-bx))
-100	0	0	6.52156	78.4				Coefficients:
-50	10	0.2						a =	1	a =	1.157
-20	20	0.4						b =	0.42	b =	0.02
-10	40	0.6						c =	0.06
0	60	0.8
50	80	0.9						U-IHydrCond1=		0.778818
100	100	1						U-IHydrCond2=		0.91581
Table Available water capacity (m3*m-3)
Available water
Control	Biostimulant
0.15	0.185
Index available water 1=		Percent change in available water						Best fit equantion for Utility
		23.3178
IAvWater2=		37						1. Logistic model: y=a/(1+b*exp(-cx))
IAvWater1	IAvWater2 (*200)	Utility						2. Exponential fit: y=a(1-exp(-bx))
-100	0	0	23.3178	37				Coefficients:
-50	10	0.2						a =	1	a =	1.157
-20	20	0.4						b =	0.42	b =	0.02
-10	40	0.6						c =	0.06
0	60	0.8
50	80	0.9						U-IAvWater-1=		0.90607
100	100	1						U-IAvWater-2=		0.604979
Table Porosity (m3*m-3)
Porosity
Control	Biostimulant
0.24	0.28
Index Soil porosity1=		Percent change soil porosity						Best fit equantion for Utility
		16.5975
ISoilPor2=		56						1. Logistic model: y=a/(1+b*exp(-cx))
ISoilPor1	ISoilPor2 (*200)	Utility						2. Exponential fit: y=a(1-exp(-bx))
-100	0	0	16.5975	56				Coefficients:
-50	10	0.2						a =	1	a =	1.157
-20	20	0.4						b =	0.42	b =	0.02
-10	40	0.6						c =	0.06
0	60	0.8
50	80	0.9						U-ISoilPor-1=		0.865687
100	100	1						U-ISoilPor-2=		0.779494
Table compaction (MPa)
Soil compaction
Control	Biostimulant
1.6	1.2
Index compaction 1=		Percent change in compaction						Best fit equantion for Utility
		-24.8447
ICompac2=		6						1. Sinusoid fit: y=a+b*cos(cx+d)
ICompac1=	ICompac2 (*5)	Utility						2. Logistic model: y=a/(1+b*exp(-cx))
100	100	0	-24.8447	6				Coefficients:
60	75	0.1						a =	0.56	a =	-14.6
40	50	0.2						b =	0.58	b =	-15.6
20	25	0.4						c =	0.021	c =	-0.0335
0	10	0.7						d =	1.33
-50	5	0.9						U-ICompac-1=		0.960639	0.960639
-100	0	1						U-ICompac-2=		0.807837
Table average particle size (mm)
Aggregate stability
Control	Biostimulant
3.4	3.8
Index aggregate stability 1=		Percent change in aggregate stability						Best fit equantion for Utility
		11.7302
IAggrStab2=		38						1. Logistic model: y=a/(1+b*exp(-cx))
IAggrStab1=	IAggrStab2 (*10)	Utility						2. Exponential fit: y=a(1-exp(-bx))
-100	0	0	11.7302	38				Coefficients:
-50	10	0.2						a =	1	a =	1.157
-20	20	0.4						b =	0.42	b =	0.02
-10	40	0.6						c =	0.06
0	60	0.8
50	80	0.9						U-IEstabAgr-1=		0.827971
100	100	1						U-IEstabAgr-2=		0.61591
Indicators Soil physics		Confirm indicator (insert 1)	Quality indices	Impact indices	Baseline (0,7)
Hydraulic conditivity		1	0.91581	0.778818	0.7
Available water		1	0.604979	0.90607	0.7
Porosity		1	0.779494	0.865687	0.7
Soil compaction		1	0.807837	0.960639	0.7
Aggregate stability		1	0.61591	0.827971	0.7
		5	0.744806	0.867837

## Sheet: Soil biology
Soil biology
Table mg p-nitrophenol kg-1 soil h-1
Acidic phosphatase
Control	Biostimulant
890	1005
Index phosphatase 1=		Percent change in activity						Best fit equation for Utility
		12.9213
IPhosphatase2=		83.75						1. Logistic model: y=a/(1+b*exp(-cx))
IPhosphatase1=	Iphosphatase2 (/12)	Utility						2. Quadratic fit: y=a+bx+cx^2
-100	0	0	12.9213	83.75				Coefficients:
-50	2	0.1						a =	1	a =	-0.07
-25	8	0.2						b =	0.42	b =	0.0143272
0	16	0.4						c =	0.070072	c =	-3.63072e-05
25	40	0.7
50	80	0.9						U-IFostat1=		0.854821
100	100	1						U-IFosfat2=		0.87524
Table mg p-nitrophenol kg-1 soil h-1
β-Glycosidase
Control	Biostimulant
190	180
Index Glycosidase 1=		Percent change in activity						Best fit equation for Utility
		-5.26316
IGlycosi2=		90						1. Logistic model: y=a/(1+b*exp(-cx))
IGlycosi1=	IGlycosi2 (/2)	Utility						2. Quadratic fit: y=a+bx+cx^2
-100	0	0	-5.26316	90				Coefficients:
-50	2	0.1						a =	1	a =	-0.07
-25	8	0.2						b =	0.42	b =	0.0143272
0	16	0.4						c =	0.070072	c =	-3.63072e-05
25	40	0.7
50	80	0.9						U-IGlycosi1=		0.622154
100	100	1						U-IGlycosi2=		0.925357
Table mg p-nitrophenol kg-1 soil h-1
Arylsulfatase
Control	Biostimulant
112	126
Index Arylsulfatase 1=		Percent change in activity						Best fit equation for Utility
		12.5
IArylsulf2=		84						1. Logistic model: y=a/(1+b*exp(-cx))
IArylsulf1=	IArylsulf2 (/1,5)	Utility						2. Quadratic fit: y=a+bx+cx^2
-100	0	0	12.5	84				Coefficients:
-50	2	0.1						a =	1	a =	-0.07
-25	8	0.2						b =	0.42	b =	0.0143272
0	16	0.4						c =	0.070072	c =	-3.63072e-05
25	40	0.7
50	80	0.9						U-IArylsulf1=		0.851118
100	100	1						U-IArylsulf2=		0.877299
Table mg H/g soil
Dehydrogenase
Control	Biostimulant
17	19
Index dehydrogenase 1=		Percent change in activity						Best fit equation for Utility
		11.7646
IDehydrog2=		76						1. Logistic model: y=a/(1+b*exp(-cx))
IDehydrog1=	IDehydrog2 (*4)	Utility						2. Quadratic fit: y=a+bx+cx^2
-100	0	0	11.7646	76				Coefficients:
-50	2	0.1						a =	1	a =	-0.07
-25	8	0.2						b =	0.42	b =	0.0143272
0	16	0.4						c =	0.070072	c =	-3.63072e-05
25	40	0.7
50	80	0.9						U-IDehydrog1=		0.84447
100	100	1						U-IDehydrog2=		0.809155
Table mg/g soil
Polysaccharides
Control	Biostimulant
2.2	2.7
Index polysaccharides 1=		Percent change in polysaccharides						Best fit equation for Utility
		22.6244
IPolys2=		54						1. Logistic model: y=a/(1+b*exp(-cx))
IPolys1=	IPolys2 (*20)	Utility						2. Quadratic fit: y=a+bx+cx^2
-100	0	0	22.6244	54				Coefficients:
-50	2	0.1						a =	1	a =	-0.07
-25	8	0.2						b =	0.42	b =	0.0143272
0	16	0.4						c =	0.070072	c =	-3.63072e-05
25	40	0.7
50	80	0.9						U-IPolys1=		0.920769
100	100	1						U-IPolys2=		0.597795
Table mg C/g soil
Microbial biomass
Control	Biostimulant
300	410
Index microbial biomass 1=		Percent change in microbil biomass						Best fit equation for Utility
		36.6654
IMicrBio2=		82						1. Logistic model: y=a/(1+b*exp(-cx))
IMicroBio1=	IMicroBio (/5)	Utility						2. Quadratic fit: y=a+bx+cx^2
-100	0	0	36.6654	82				Coefficients:
-50	2	0.1						a =	1	a =	-0.07
-25	8	0.2						b =	0.42	b =	0.0143272
0	16	0.4						c =	0.070072	c =	-3.63072e-05
25	40	0.7
50	80	0.9						U-IMicroBio1=		0.968833
100	100	1						U-IMicroBio2=		0.860699
Indicators Soil biology		Confirm indicator (insert 1)	Quality indices	Impact indices (change)	Baseline (0,7)
Acidic phosphatase		1	0.87524	0.854821	0.7
β-Glycosidase		1	0.925357	0.622154	0.7
Arylsulfatase		1	0.877299	0.851118	0.7
Dehydrogenase		1	0.809155	0.84447	0.7
Polysaccharides		1	0.597795	0.920769	0.7
Microbial biomass		1	0.860699	0.968833	0.7
		6	0.824257	0.843694

## Sheet: Plant health
Plant health
Table Percentage of symptom suppression
Percent symptom suppression
Control	Biostimulant
20	16
Index suppression1=		Percent change symptoms suppression						Best fit equation for Utility
		-19.9999
ISympSup		Utility						1. Sinusoidal fit: y=a+b*cos(cx+d)
100		0	-19.9999					Coefficients:
60		0.1						a =	0.56
40		0.2						b =	0.58
20		0.4						c =	0.021
0		0.7						d =	1.33
-50		0.9						U-ISympSup=		0.915972	0.915972
-100		1								0.915972
Table number of propagules/100 g soil
Suppression Rhizoctonia solani (dumping off)
Control	Biostimulant
19	25
Index Rhizoctonia1=		Percent change in number of propagules						Best fit equation for Utility
		31.5788
IRhizoc2=		25						1. Sinusoidal fit: y=a+b*cos(cx+d)
IRhizoc1	IRhizoc2	Utility						2. Quadratic fit: y=a+bx+cx^2
100	100	0	31.5788	25				Coefficients:
60	50	0.1						a =	0.56	a =	1
40	25	0.2						b =	0.58	b =	-0.0180131
20	10	0.4						c =	0.021	c =	8.0205e-05
0	5	0.7						d =	1.33
-50	1	0.9						U-IRhizoc1=		0.322251	0.322251
-100	0	1						U-IRhizoc2=		0.599801	0.599801
Table number of propagules/100 g soil
Suppression Sclerotinia sclerotiorum (white mold)
Control	Biostimulant
22	18
Index Sclerotinia 1=		Percent change in number of propagules						Best fit equation for Utility
		-18.1817
IScler2=		36						1. Sinusoidal fit: y=a+b*cos(cx+d)
IScler1	IScler2 (*2)	Utility						2. Quadratic fit: y=a+bx+cx^2
100	100	0	-18.1817	36				Coefficients:
60	50	0.1						a =	0.56	a =	1
40	25	0.2						b =	0.58	b =	-0.0180131
20	10	0.4						c =	0.021	c =	8.0205e-05
0	5	0.7						d =	1.33
-50	1	0.9						U-IScler1=		0.898233	0.898233
-100	0	1						U-IScler2=		0.455475	0.455475
Table number of propagules/ g soil
Suppression Fusarium solani
Control	Biostimulant
1200	1000
Index Fusarium1=		Percent change in number of propagules						Best fit equation for Utility
		-16.6667
IFusar2=		20						1. Sinusoidal fit: y=a+b*cos(cx+d)
IFusar1	IFusar2 (/50)	Utility						2. Quadratic fit: y=a+bx+cx^2
100	100	0	-16.6667	20				Coefficients:
60	50	0.1						a =	0.56	a =	1
40	40	0.2						b =	0.58	b =	-0.0180131
20	30	0.4						c =	0.021	c =	8.0205e-05
0	20	0.7						d =	1.33
-50	10	0.9						U-IFusar1=		0.883073	0.883073
-100	0	1						U-IFusar2=		0.67182	0.67182
Table number/100 g soil
Suppression Phytonematoids
Control	Biostimulant
19	20
Índice Phytonemat1=		Percent change in number of phytonematoids						Best fit equation for Utility
		5.26313
IPhytonemat2=		20						1. Sinusoidal fit: y=a+b*cos(cx+d)
IPhytonemat1	IPhytonemat2	Utility						2. Quadratic fit: y=a+bx+cx^2
100	100	0	5.26313	20				Coefficients:
60	50	0.1						a =	0.56	a =	1
40	25	0.2						b =	0.58	b =	-0.0180131
20	10	0.4						c =	0.021	c =	8.0205e-05
0	5	0.7						d =	1.33
-50	1	0.9						U-IPhytonemat1=		0.635343	0.635343
-100	0	1						U-IPhytonemat2=		0.67182	0.67182
Table ABS (285 nm/gfw)
Glyceollin
Control	Biostimulant
1	1.2
Índice Glyceollin 1=		Percent change in activity						Best fit equation for Utility
		19.998
IGlyceol2=		60						1. Logistic model: y=a/(1+b*exp(-cx))
IGlyceol1=	IGlyceol2 (*50)	Utility						2. Quadratic fit: y=a+bx+cx^2
-100	0	0	19.998	60				Coefficients:
-50	2	0.1						a =	1	a =	-0.07
-25	8	0.2						b =	0.42	b =	0.0143272
0	16	0.4						c =	0.070072	c =	-3.63072e-05
25	40	0.7
50	80	0.9						U-IGlyceol1=		0.90626
100	100	1						U-IGlyceol2=		0.658924
Table mmol/min.mg protein
Catalase
Control	Biostimulant
75	80
Index Catalase 1=		Percent change in activity						Best fit equation for Utility
		6.66666
ICatalase2=		80						1. Logistic model: y=a/(1+b*exp(-cx))
ICatalase1=	ICatalase2	Utility						2. Quadratic fit: y=a+bx+cx^2
-100	0	0	6.66666	80				Coefficients:
-50	2	0.1						a =	1	a =	-0.07
-25	8	0.2						b =	0.42	b =	0.0143272
0	16	0.4						c =	0.070072	c =	-3.63072e-05
25	40	0.7
50	80	0.9						U-ICatalase1=		0.791608
100	100	1						U-ICatalase2=		0.843808
Table mmol/min.mg protein
Peroxidase
Control	Biostimulant
62	66
Index Peroxidase 1=		Percent change in activity						Best fit equation for Utility
		6.4516
IPeroxidase2=		66						1. Logistic model: y=a/(1+b*exp(-cx))
IPeroxi1=	IPeroxi2	Utility						2. Quadratic fit: y=a+bx+cx^2
-100	0	0	6.4516	66				Coefficients:
-50	2	0.1						a =	1	a =	-0.07
-25	8	0.2						b =	0.42	b =	0.0143272
0	16	0.4						c =	0.070072	c =	-3.63072e-05
25	40	0.7
50	80	0.9						U-IPeroxi1=		0.789111
100	100	1						U-IPeroxi2=		0.717439
Table mmol/min.mg protein
β-1,3 Glucanase
Control	Biostimulant
26	24
Index Glucanase 1=		Percent change in activity						Best fit equation for Utility
		-7.69228
IGlucanase2=		72						1. Logistic model: y=a/(1+b*exp(-cx))
IGlucan1=	IGlucan2 (*3)	Utility						2. Quadratic fit: y=a+bx+cx^2
-100	0	0	-7.69228	72				Coefficients:
-50	2	0.1						a =	1	a =	-0.07
-25	8	0.2						b =	0.42	b =	0.0143272
0	16	0.4						c =	0.070072	c =	-3.63072e-05
25	40	0.7
50	80	0.9						U-IGlucan1=		0.581391
100	100	1						U-IGlucan2=		0.77334
Table mmol/min.mg protein
Polyphenoloxidase
Control	Biostimulant
3.2	3.4
Índice Polyphenol 1=		Percent change in activity						Best fit equation for Utility
		6.2498
IPolyphenol2=		68						1. Logistic model: y=a/(1+b*exp(-cx))
IPolyphenol1=	IPolyphenol2 (*20)	Utility						2. Quadratic fit: y=a+bx+cx^2
-100	0	0	6.2498	68				Coefficients:
-50	2	0.1						a =	1	a =	-0.07
-25	8	0.2						b =	0.42	b =	0.0143272
0	16	0.4						c =	0.070072	c =	-3.63072e-05
25	40	0.7
50	80	0.9						U-IPolyphenol1=		0.786749
100	100	1						U-IPolyphenol2=		0.736363
Indicators Plant health		Confirm indicator (insert 1)	Quality indices	Impact indices (change)	Linha de base (0,7)
Percent symptom suppression		1	0.915972	0.915972	0.7
Suppression Rhizoctonia solani (dumping off)		1	0.599801	0.322251	0.7
Suppression Sclerotinia sclerotiorum (white mold)		1	0.455475	0.898233	0.7
Suppression Fusarium solani		1	0.67182	0.883073	0.7
Suppression Phytonematoids		1	0.67182	0.635343	0.7
Glyceollin		1	0.658924	0.90626	0.7
Catalase		1	0.843808	0.791608	0.7
Peroxidase		1	0.717439	0.789111	0.7
β-1,3 Glucanase		1	0.77334	0.581391	0.7
Polyphenoloxidase		1	0.736363	0.786749	0.7
		10	0.704476	0.750999

## Sheet: Results
System for Weighted Environmental Impact Assessment of Rural Actitivities (APOIA-NovoRural)
Module APOIA-Biostimulants
Dimensions of crop performance, plant health, soil physicochemical, and biological quality				Baseline	Performance index	Impact index
Indicators of Crop development and Productive performance			Crop development and productive performance	0.7	0.879923	0.879923	1
Indicators Soil chemistry			Soil chemistry	0.7	0.738115	0.848358	1
Indicators Soil physics			Soil physics	0.7	0.744806	0.867837	1
Indicators Soil biology			Soil biology	0.7	0.824257	0.843694	1
Indicators Plant health			Plant health	0.7	0.704476	0.750999	1
Índice de desempenho Microgeo					0.778316		5
Índice de Impacto Microgeo					0.838162
